# Supplementary material for: Paper-based colorimetric sensor using a single-atom nanozyme for the ultrasensitive detection of Cr(vi) in short-necked clams
Source: Royal Society of Chemistry journal article supplement (doi:10.1039/d4ay00891j), 2024-01-01
Supplement: d4ay00891j1.pdf [file d4ay00891j1.pdf]

supporting information

**Paper-based colorimetric sensor using single-atom nanozyme for the ultrasensitive detection of Cr(VI) in Short Necked Clam**

*E-mail addresses: [huangtiansheng505@163.com](mailto:huangtiansheng505@163.com) (T.Z. Huang), [hmcao@hainanu.edu.cn](mailto:hmcao@hainanu.edu.cn)(H.M. Cao), and [daixinye@shu.edu.cn](mailto:daixinye@shu.edu.cn) (D.X. Ye)*

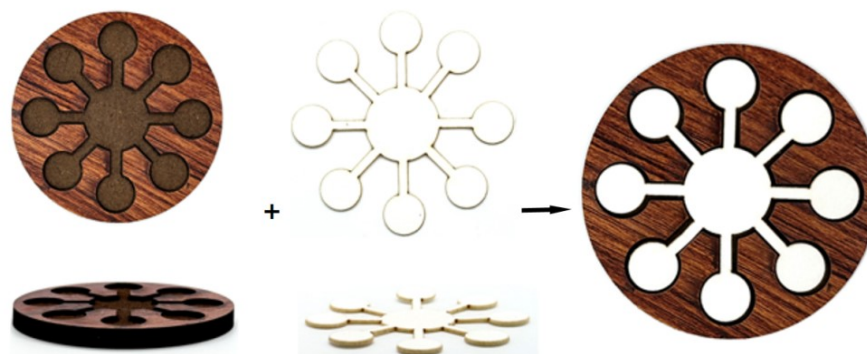

**Figure S1.** Schematic of PAD fabrication.

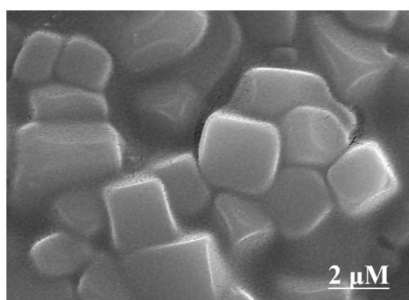

**Figure S2.** SEM of lyophilized sample before the pyrolysis.

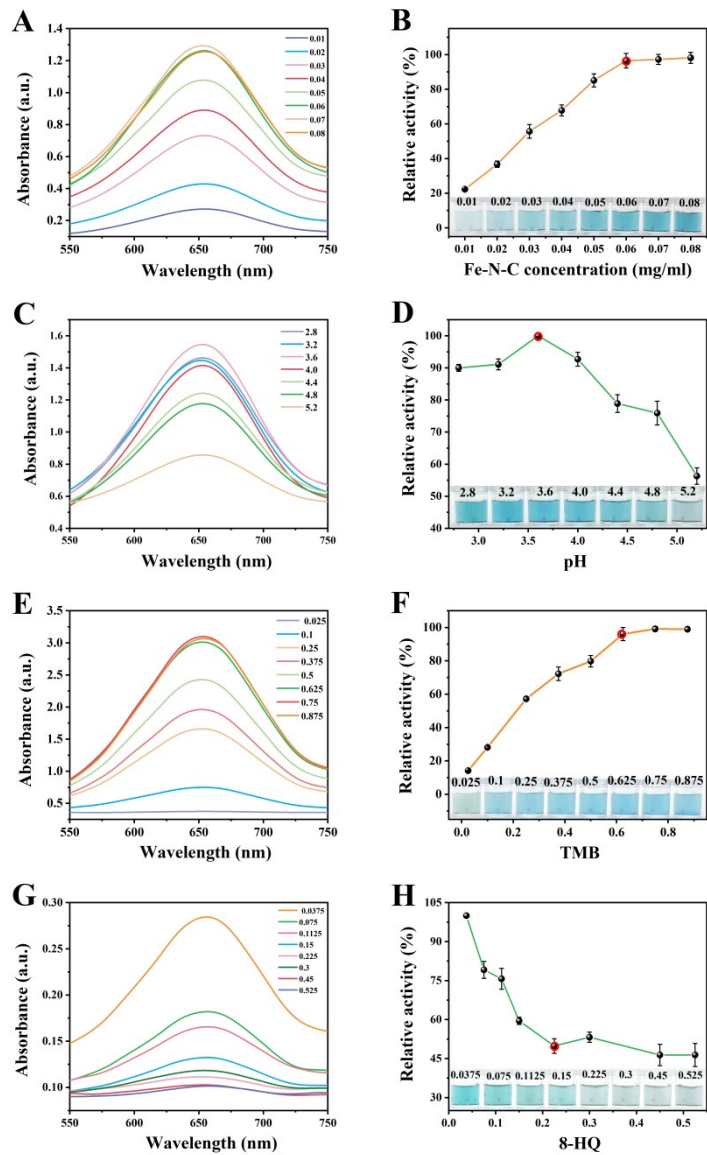

**Figure S3.** Optimization of experimental parameters. Fe-N-C concentration (A, B); pH (C, D); TMB (E,F); 8-HQ (G,H).

**Table S1** Compared the apparent Michaelis-Menten constant ( $K_m$ ) and maximum reaction rate ( $V_{max}$ ) of Fe-C-N with those of previously reported SAzymes.

| SAzymes  | substrate | $K_m$ (mM) | $V_m$ ( $\times 10^{-8} Ms^{-1}$ ) | Reference |
|----------|-----------|------------|------------------------------------|-----------|
| FeCu-NC  |           | 0.05       | 7.88                               | 1         |
| Fe-N/S-C |           | 0.453      | 9.497                              | 2         |
| FeBi-NC  |           | 0.21       | 7.0                                | 3         |
| P-N-C    | TMB       | 0.696      | 10.215                             | 4         |
| SA-Fe/NG |           | 0.1772     | 4.3                                | 5         |
| Co-N-C   |           | 0.1496     | 1.073                              | 6         |
| Fe-N-C   |           | 0.3589     | 7.819                              | This work |

**Table S2** Comparison of the method developed in this work with other published methods for Cr(VI) detection.

| Methods               | Sensing probe | Linear range ( $\mu M$ ) | LOD ( $\mu M$ ) | Reference |
|-----------------------|---------------|--------------------------|-----------------|-----------|
| Colorimetric          | H-Fe-POP      | 2-130 $\mu M$            | 0.23 $\mu M$    | 7         |
| Colorimetric          | Fe-N-C        | 0.03-3 $\mu M$           | 3 nM            | 5         |
| Fluorescence          | CDs           | 1-400 $\mu M$            | 0.24 $\mu M$    | 8         |
| fluorescence analysis | B, N-CDs      | 0.3-500 $\mu M$          | 0.24 $\mu M$    | 9         |
| Fluorescent Papers    | Test CD       | 0-0.1M                   | 1 $\mu M$       | 10        |
| Colorimetric          | Fe-N-C        | 4-1300 $\mu M$           | 1.11 $\mu M$    | This work |
| Paper chip            | Fe-N-C        | 5-1000 $\mu M$           | 1.19 $\mu M$    | This work |

**Table S3** The UV-vis absorption spectra of TMB + Fe-N-C (a), Fe-N-C+TMB+8-HQ (b) and TMB + Fe-N-C+8-HQ+Cr (VI) (c).

| Wavelength (nm) | a.TMB  | b.Fe-N-C | c.TMB+Fe-N-C |
|-----------------|--------|----------|--------------|
| 550             | 0.0351 | 0.2709   | 0.5055       |
| 560             | 0.0351 | 0.2707   | 0.5353       |
| 570             | 0.0351 | 0.271    | 0.5701       |
| 580             | 0.035  | 0.2699   | 0.6263       |
| 590             | 0.0352 | 0.2708   | 0.7034       |
| 600             | 0.0355 | 0.2707   | 0.7794       |
| 610             | 0.0355 | 0.2707   | 0.8514       |
| 620             | 0.0353 | 0.2707   | 0.9307       |
| 630             | 0.0352 | 0.2702   | 1.0175       |
| 640             | 0.0351 | 0.27     | 1.0805       |
| 650             | 0.0351 | 0.2698   | 1.1112       |
| 660             | 0.0351 | 0.2695   | 1.1122       |
| 670             | 0.0351 | 0.2695   | 1.0753       |
| 680             | 0.0351 | 0.2696   | 1.0008       |
| 690             | 0.0353 | 0.2695   | 0.9112       |
| 700             | 0.0353 | 0.2693   | 0.8231       |
| 710             | 0.0361 | 0.2704   | 0.73         |
| 720             | 0.0373 | 0.2712   | 0.6534       |
| 730             | 0.0394 | 0.2731   | 0.6041       |
| 740             | 0.0412 | 0.2749   | 0.5772       |
| 750             | 0.0415 | 0.275    | 0.5644       |

**Table S4** The UV-vis absorption spectra of TMB + Fe-N-C (a), TMB + Fe-N-C+8-HQ (b), TMB + Fe-N-C+8-HQ+Cr(VI) (c).

| Wavelength (nm) | a.Fe-N-C+TMB | b.Fe-N-C+TMB+8-HQ | c.Fe-N-C+TMB+8-HQ+Cr |
|-----------------|--------------|-------------------|----------------------|
| 550             | 0.1556       | 0.1141            | 0.3647               |
| 560             | 0.1674       | 0.1149            | 0.3948               |
| 570             | 0.1815       | 0.1165            | 0.4301               |
| 580             | 0.1973       | 0.1201            | 0.4782               |
| 590             | 0.2175       | 0.1242            | 0.5403               |
| 600             | 0.2402       | 0.1286            | 0.6028               |
| 610             | 0.2604       | 0.1335            | 0.665                |
| 620             | 0.2832       | 0.1386            | 0.7317               |
| 630             | 0.3084       | 0.1442            | 0.8042               |
| 640             | 0.3253       | 0.1473            | 0.8593               |
| 650             | 0.3345       | 0.1487            | 0.8887               |
| 660             | 0.3344       | 0.149             | 0.891                |
| 670             | 0.3229       | 0.1462            | 0.8596               |
| 680             | 0.2998       | 0.1413            | 0.79                 |
| 690             | 0.2734       | 0.1351            | 0.7077               |
| 700             | 0.2476       | 0.1283            | 0.625                |
| 710             | 0.221        | 0.1243            | 0.5348               |
| 720             | 0.2004       | 0.1202            | 0.4631               |
| 730             | 0.1868       | 0.1177            | 0.4092               |
| 740             | 0.1803       | 0.1169            | 0.3814               |
| 750             | 0.177        | 0.1171            | 0.3673               |

**Table S5** Optimization of experimental parameters (TMB).

| Wavelen<br>gth (nm) | 0.025  | 0.1    | 0.25   | 0.375  | 0.5    | 0.625  | 0.75   | 0.875  |
|---------------------|--------|--------|--------|--------|--------|--------|--------|--------|
| 550                 | 0.3572 | 0.4331 | 0.6154 | 0.6589 | 0.7744 | 0.8631 | 0.8712 | 0.8439 |
| 560                 | 0.3555 | 0.4505 | 0.6834 | 0.7403 | 0.8806 | 1.0005 | 1.0064 | 0.9816 |
| 570                 | 0.3546 | 0.4718 | 0.7611 | 0.8495 | 1.0044 | 1.1595 | 1.1891 | 1.1424 |
| 580                 | 0.3554 | 0.5021 | 0.8671 | 0.9697 | 1.1716 | 1.3755 | 1.393  | 1.3587 |
| 590                 | 0.3577 | 0.5418 | 1.0033 | 1.1306 | 1.3835 | 1.6524 | 1.6614 | 1.6376 |
| 600                 | 0.3613 | 0.5818 | 1.1384 | 1.3084 | 1.5964 | 1.9279 | 1.9657 | 1.9165 |
| 610                 | 0.3639 | 0.6209 | 1.2692 | 1.4631 | 1.7965 | 2.1985 | 2.2296 | 2.1902 |
| 620                 | 0.3667 | 0.6622 | 1.4034 | 1.6314 | 2.0105 | 2.4803 | 2.5167 | 2.477  |
| 630                 | 0.3697 | 0.705  | 1.5381 | 1.8094 | 2.2292 | 2.7549 | 2.8165 | 2.7666 |
| 640                 | 0.3718 | 0.736  | 1.6288 | 1.9212 | 2.3796 | 2.9475 | 3.0248 | 2.9807 |
| 650                 | 0.3733 | 0.7502 | 1.6664 | 1.968  | 2.4368 | 3.0245 | 3.1069 | 3.0742 |
| 660                 | 0.3732 | 0.7479 | 1.654  | 1.9529 | 2.4175 | 3.0021 | 3.0928 | 3.0636 |
| 670                 | 0.3718 | 0.7242 | 1.5787 | 1.8611 | 2.2977 | 2.8713 | 2.9522 | 2.9543 |
| 680                 | 0.3688 | 0.6771 | 1.4425 | 1.6933 | 2.0834 | 2.5879 | 2.6754 | 2.6682 |
| 690                 | 0.3657 | 0.6267 | 1.289  | 1.5039 | 1.8441 | 2.2859 | 2.3658 | 2.3604 |
| 700                 | 0.3624 | 0.576  | 1.1327 | 1.3076 | 1.61   | 1.9672 | 2.0344 | 2.0332 |
| 710                 | 0.3603 | 0.5296 | 0.9889 | 1.1304 | 1.3589 | 1.6719 | 1.7271 | 1.7231 |
| 720                 | 0.3583 | 0.4854 | 0.8513 | 0.9578 | 1.149  | 1.3845 | 1.4278 | 1.4205 |
| 730                 | 0.3582 | 0.4557 | 0.7575 | 0.8394 | 1.0062 | 1.186  | 1.2203 | 1.2092 |
| 740                 | 0.3586 | 0.4407 | 0.7068 | 0.7755 | 0.926  | 1.0793 | 1.1091 | 1.0946 |
| 750                 | 0.3582 | 0.4323 | 0.6807 | 0.7437 | 0.8841 | 1.025  | 1.0509 | 1.0349 |

**Table S6** Optimization of experimental parameters (8-HQ).

| Wavelen<br>gth (nm) | 0.0375 | 0.075  | 0.1125 | 0.15   | 0.225  | 0.3    | 0.45   | 0.525  |
|---------------------|--------|--------|--------|--------|--------|--------|--------|--------|
| 550                 | 0.1476 | 0.1075 | 0.1076 | 0.0961 | 0.0962 | 0.095  | 0.0938 | 0.0901 |
| 560                 | 0.1548 | 0.1117 | 0.1112 | 0.0979 | 0.0968 | 0.0961 | 0.0929 | 0.09   |
| 570                 | 0.164  | 0.1169 | 0.1134 | 0.1002 | 0.0982 | 0.0982 | 0.0925 | 0.0906 |
| 580                 | 0.1764 | 0.1229 | 0.1184 | 0.1032 | 0.0994 | 0.1001 | 0.0935 | 0.091  |
| 590                 | 0.1925 | 0.1319 | 0.1251 | 0.1073 | 0.1008 | 0.1026 | 0.0949 | 0.0918 |
| 600                 | 0.2084 | 0.1403 | 0.1321 | 0.1115 | 0.1028 | 0.1059 | 0.0961 | 0.0931 |
| 610                 | 0.225  | 0.1489 | 0.1392 | 0.1162 | 0.1048 | 0.1092 | 0.0978 | 0.0945 |
| 620                 | 0.2424 | 0.1584 | 0.1468 | 0.1209 | 0.1073 | 0.1119 | 0.0991 | 0.0965 |
| 630                 | 0.2621 | 0.1696 | 0.1555 | 0.1265 | 0.1094 | 0.1148 | 0.1009 | 0.0982 |
| 640                 | 0.2766 | 0.1776 | 0.1617 | 0.1301 | 0.1109 | 0.1171 | 0.1021 | 0.1    |
| 650                 | 0.2841 | 0.1816 | 0.1653 | 0.1322 | 0.1116 | 0.1184 | 0.1027 | 0.1012 |
| 660                 | 0.2852 | 0.1825 | 0.1661 | 0.1326 | 0.1112 | 0.1183 | 0.1027 | 0.1016 |
| 670                 | 0.2777 | 0.1787 | 0.163  | 0.1303 | 0.1101 | 0.1167 | 0.1014 | 0.1008 |
| 680                 | 0.2614 | 0.1698 | 0.156  | 0.1255 | 0.1079 | 0.1137 | 0.0993 | 0.0991 |
| 690                 | 0.2415 | 0.1589 | 0.1476 | 0.1203 | 0.1051 | 0.1101 | 0.0972 | 0.0976 |
| 700                 | 0.221  | 0.1473 | 0.1392 | 0.1146 | 0.1021 | 0.1063 | 0.0952 | 0.0951 |
| 710                 | 0.199  | 0.135  | 0.1302 | 0.1089 | 0.0993 | 0.1024 | 0.0929 | 0.0933 |
| 720                 | 0.1808 | 0.1251 | 0.1232 | 0.1045 | 0.0981 | 0.0999 | 0.0916 | 0.0929 |
| 730                 | 0.1694 | 0.1196 | 0.1193 | 0.1024 | 0.0981 | 0.0989 | 0.0914 | 0.0932 |
| 740                 | 0.1637 | 0.1191 | 0.1167 | 0.1022 | 0.0992 | 0.0993 | 0.0921 | 0.0944 |
| 750                 | 0.1605 | 0.1185 | 0.1157 | 0.102  | 0.0991 | 0.0991 | 0.0921 | 0.0942 |



**Table S7** Optimization of experimental parameters (pH).

| Wavelen<br>gth (nm) | 2.8   | 3.2   | 3.6   | 4.0   | 4.4   | 4.8   | 5.2   |
|---------------------|-------|-------|-------|-------|-------|-------|-------|
| 550                 | 0.616 | 0.639 | 0.616 | 0.54  | 0.57  | 0.56  | 0.559 |
| 560                 | 0.67  | 0.691 | 0.675 | 0.592 | 0.611 | 0.599 | 0.577 |
| 570                 | 0.741 | 0.759 | 0.752 | 0.667 | 0.667 | 0.65  | 0.602 |
| 580                 | 0.824 | 0.842 | 0.844 | 0.751 | 0.734 | 0.711 | 0.632 |
| 590                 | 0.922 | 0.938 | 0.952 | 0.854 | 0.811 | 0.781 | 0.666 |
| 600                 | 1.028 | 1.042 | 1.07  | 0.962 | 0.895 | 0.858 | 0.702 |
| 610                 | 1.143 | 1.153 | 1.196 | 1.081 | 0.985 | 0.941 | 0.742 |
| 620                 | 1.259 | 1.261 | 1.322 | 1.204 | 1.076 | 1.026 | 0.781 |
| 630                 | 1.358 | 1.353 | 1.43  | 1.303 | 1.155 | 1.098 | 0.817 |
| 640                 | 1.431 | 1.421 | 1.512 | 1.38  | 1.214 | 1.154 | 0.845 |
| 650                 | 1.468 | 1.454 | 1.552 | 1.421 | 1.246 | 1.181 | 0.859 |
| 660                 | 1.458 | 1.439 | 1.541 | 1.41  | 1.239 | 1.175 | 0.856 |
| 670                 | 1.396 | 1.372 | 1.47  | 1.345 | 1.191 | 1.13  | 0.833 |
| 680                 | 1.29  | 1.262 | 1.352 | 1.232 | 1.107 | 1.053 | 0.793 |
| 690                 | 1.162 | 1.131 | 1.21  | 1.098 | 1.007 | 0.96  | 0.746 |
| 700                 | 1.027 | 0.993 | 1.06  | 0.96  | 0.902 | 0.861 | 0.696 |
| 710                 | 0.91  | 0.864 | 0.924 | 0.832 | 0.801 | 0.774 | 0.653 |
| 720                 | 0.809 | 0.768 | 0.814 | 0.726 | 0.728 | 0.703 | 0.616 |
| 730                 | 0.735 | 0.698 | 0.739 | 0.657 | 0.675 | 0.65  | 0.588 |
| 740                 | 0.692 | 0.652 | 0.691 | 0.612 | 0.642 | 0.62  | 0.574 |
| 750                 | 0.672 | 0.626 | 0.667 | 0.591 | 0.625 | 0.605 | 0.566 |

## References

- 1 X. Chen, Y. Wang, M. Feng, D. Deng, X. Xie, C. Deng, K. Khattak, and X. Yang, *Chin Chem Lett*, 2023, **34**, 107969.
- 2 R. Li, X. He, R. Javed, J. Cai, H. Cao, X. Liu, Q. Chen, D. Ye, and H. Zhao, *Sci. Total Environ.*, 2022, **834**, 155428.
- 3 Q. Chen, Y. Liu, Y. Lu, Y. Hou, X. Zhang, W. Shi, and Y. Huang, *J. Hazard. Mater.*, 2022, **422**, 126929.
- 4 Y. Li, Y. Zhang, R. Javed, R. Li, H. Zhao, X. Liu, C. Zhang, H. Cao, and D. Ye, *Food. Chem.*, 2024, **441**, 138315.
- 5 Y. Mao, S. Gao, L. Yao, L. Wang, H. Qu, Y. Wu, Y. Chen, and L. Zheng, *J. Hazard. Mater.*, 2021, **408**, 124898.
- 6 L. Sun, Y. Yan, S. Chen, Z. Zhou, W. Tao, C. Li, Y. Feng, and F. Wang, *Anal. Bioanal Chem.*, 2022, **414**, 1857-1865.
- 7 L. Zhu, Yang, F., Lou, C. et al., *Microchim Acta*, 2023, **190**, 339.
- 8 L. Bu, J. Peng, H. Peng, S. Liu, H. Xiao, D. Liu, Z. Pan, Y. Chen, F. Chen, and Y. He, *RSC Adv.*, 2016, **6**, 95469-95475.
- 9 Y. Wang, X. Hu, W. Li, X. Huang, Z. Li, W. Zhang, X. Zhang, X. Zou, and J. Shi, *Spectrochim Acta A Mol Biomol Spectrosc*, 2020, **243**, 118807.
- 10 Y. Yang, X. Chen, Y. Wang, M. Wu, Y. Ma, and X. Yang, *Front Chem.*, 2020, **8**, 595628.
